# Supplementary material
Source: publisher figshare collection journal article supplement (https://frontiersin.figshare.com/ndownloader/files/13076903)
Supplement: Supplementary file [file 13076903]

**Supplementary Table S1.** Oligonucleotides used in this study.

| Target and oligonucleotides                   | Sequence               | bp amplified |
|-----------------------------------------------|------------------------|--------------|
| <b><i>dly</i></b>                             |                        |              |
| Dly-5'                                        | CTCCTATGGGACATGAATGG   | 549          |
| Dly-3'                                        | TGCTCTAGGCTAAATGAATC   |              |
| <b><i>phlyP (hlyA<sub>pl</sub>)</i></b>       |                        |              |
| PhlyP-5'                                      | GCTATAAATGAATAAGAAAA   | 767          |
| PhlyP-3'                                      | TTGAAGCTAACTCAAAAA     |              |
| <b><i>phlyC (hlyA<sub>ch</sub>)</i></b>       |                        |              |
| phlyC-5'                                      | AATGTTTCTTTCCGTTGGGC   | 353          |
| phlyC -3'                                     | CCGGAGTTCCACCAGTAAAT   |              |
| <b><i>hlyAch-det(hlyA<sub>ch</sub>)</i></b>   |                        |              |
| hlyAch-det-5'                                 | GAAGAGTTAGCGATGGTCTA   | 288          |
| hyAch-det-3'                                  | TTGATATAGCGTCTGCGCCC   |              |
| <b><i>hyAch (upstream sequences)</i></b>      |                        |              |
| hlyAch-3new                                   | ACATATACAATACGATCTGG   | variable     |
| KefA-3'                                       | TGTAGGTAGATATCGAGCTC   |              |
| <b><i>PlpV int (phospholipase)</i></b>        |                        |              |
| plp int -F                                    | TTCATAATAGCAGTAATCT    | 1618         |
| plp int -R                                    | TTACTAAGCAGAATCCAGCC   |              |
| <b><i>pPHDD1 replication origin</i></b>       |                        |              |
| Ori_pPHDD1-F                                  | TGGAATAACTATGAGTAACA   | 3052         |
| Ori_pPHDD1-R                                  | CATTACCAAAACATCTACAT   |              |
| <b><i>toxR</i></b>                            |                        |              |
| toxR-5'                                       | GGGATTTTATGGTACACAAA   | 985          |
| toxR-3'                                       | ATCATAACCAGAGAGATGCT   |              |
| <b><i>Collagenase (internal fragment)</i></b> |                        |              |
| col - F                                       | CCTGCTACAGTTCGAGCTCA   | 1617         |
| col - R                                       | TCAACCACTCGAGATATTCC   |              |
| <b><i>Collagenase (gene context)</i></b>      |                        |              |
| ups_colP_F                                    | GAGGACCATTTATTGCCAGT   | variable     |
| downs_colP_R                                  | CGGCTAAGCAAACAGAAAAC   |              |
| <b><i>Urease</i></b>                          |                        |              |
| Ure-5'                                        | TCCGGAATAGGTAAAGCGGG   | 448          |
| Ure-3'                                        | CTTGAATATCCATCTCATCTGC |              |
| <b><i>rstAB system</i></b>                    |                        |              |
| Kinasa int - F                                | TCAGCTTCATAATCTTCTAG   | 236          |
| Kinasa int - R                                | AATAAGATTGTGAGTCTACG   |              |
| <b><i>Tat-pathway protein</i></b>             |                        |              |
| vda-002799-intF                               | TCCATTTTCGTTCTTGTTCTGA | 1500         |
| vda-002799-intR                               | GATTTTTCACGGACGATAT    |              |
| <b><i>Type III secretion system</i></b>       |                        |              |
| vda-000187-intF                               | GCCGATCTCTTCACCATTAT   | 140          |
| vda-000187-intR                               | TAGAACCGCAAACTGCAAC    |              |
| <b><i>Type III secretion system</i></b>       |                        |              |
| vda-000193-intF                               | CCAACAATCGCGGCAAGAAT   | 240          |
| vda-000193-intR                               | GAGGCTCTTGAATTGTTCTC   |              |
| <b><i>Type III secretion system</i></b>       |                        |              |
| vda-000224-intF                               | AGTTATAACCGACTTTACTG   | 511          |
| vda-000224-intR                               | ACATGCTGGGCGATCAAGC    |              |

|                                               |                       |      |
|-----------------------------------------------|-----------------------|------|
| <b><i>Vibrio</i> ferrin synthesis PvsB</b>    |                       |      |
| DK2_PvsB-1000_F                               | AGCCTGTGCTCACGAAAGTT  | 980  |
| DK2_PvsB-1000_R                               | CGTCATTTTGCCTTCTTTAT  |      |
| <b><i>Vibrio</i> ferrin synthesis PvsD</b>    |                       |      |
| DK2_PvsD_1200_F                               | AAATGGTGTTTTGTTGTTGC  | 1210 |
| DK2_PvsD_1200_R                               | AATTCTGGAAGCAATTTGGT  |      |
| <b><i>Outer membrane usher</i></b>            |                       |      |
| DK3_outer membrane_800_F                      | ATTGTGGGATCCTGGTGTTA  | 800  |
| DK3_outer membrane_800_R                      | TTTCCATCCATGTTGAGTTT  |      |
| <b><i>Fimbrial protein</i></b>                |                       |      |
| DK3_fimbria_600_F                             | CGCCTATGTCTATTTTTGGG  | 600  |
| DK3_fimbria_600_R                             | GCTACTGCTAACTTTTCCAC  |      |
| <b><i>CRISPR-Cas3(System 1)</i></b>           |                       |      |
| DK29-crispr-Cas3-400-F                        | AATGCGCTAAATCATAAATC  | 400  |
| DK29-crispr-Cas3-400-R                        | AAATCCTTTATGTTGCGTAA  |      |
| <b><i>CRISPR-Csy1 (System 1)</i></b>          |                       |      |
| DK29-crispr-Csy1-200-F                        | CAGAGCGTTATCAAACATAAG | 200  |
| DK29-crispr-Csy1-200-R                        | ATACTGATTTGATTGGCTCG  |      |
| <b><i>CRISPR-Cas3 (System 2)</i></b>          |                       |      |
| cas3_sist2_F                                  | AAGCTTTGCTACTGACAAGG  | 1000 |
| cas3_sist2_R                                  | TTAGATCCTTTAAATTCTGT  |      |
| <b><i>CRISPR-Cas2 (System 2)</i></b>          |                       |      |
| cas2_sist2_F                                  | ATCAGCAGGTAAAAATTTC   | 150  |
| cas2_sist2_R                                  | TCAGGGAAATGATTTGGGAA  |      |
| <b><i>CRISPR-csy4/cas6 (System 3)</i></b>     |                       |      |
| csy4_sist3_F                                  | TGCGCTGATGAACCGCTAGA  | 290  |
| csy4_sist3_R                                  | TTGCCTTTGTTGCTGAAGAT  |      |
| <b><i>DK3-hyAch (upstream sequences)</i></b>  |                       |      |
| DK3_contorno_CDS6_F                           | AACGCTATCATGGGAACTGA  | 2000 |
| DK3_contorno_CDS7_R                           | AAATATGTCTAACGGCCTGA  |      |
| <b><i>DK20-hyAch (upstream sequences)</i></b> |                       |      |
| DK20_contorno_CDS5_R                          | TCCAAAAGGAGTATTTATCA  | 2000 |
| DK20_contorno_CDS6_F                          | GCACCAAGGAGCGGAGCAAA  |      |
| <b><i>DK29-hyAch (upstream sequences)</i></b> |                       |      |
| DK29_contorno_CDS7_R                          | CAATGTCTGTCCCTGTTAAG  | 900  |
| HlyAchr_contorno_F                            | ATAAACAAAAATTAAATTCA  |      |

---
